# Supplementary material for: Iron availability modulates bacteria carbon cycling in the mesopelagic
Source: Research Square preprint supplement (doi:10.21203/rs.3.rs-6890920/v1), 2025-06-20
Supplement: Supplementary file 1 [file 734385108b59220ab7d49c46.pdf]

## **Supplementary Information: Iron availability modulates bacteria carbon cycling in the mesopelagic**

Travis Mellett<sup>1</sup>, Patrick Monreal<sup>1</sup>, Korinna Kunde<sup>1</sup>, Lauren E. Manck<sup>2</sup>, Kelsy Cain<sup>1</sup>, François Ribalet<sup>1</sup>, Matthew J. Church<sup>2</sup>, E. Virginia Armbrust<sup>1</sup>, Randelle M. Bundy<sup>1</sup>

<sup>1</sup>University of Washington, School of Oceanography, Seattle WA

<sup>2</sup>Flathead Lake Biological Station, University of Montana, Polson, MT

### **Contents of this Supplement:**

Tables S1–S3

Figures S1–S6

### **Introduction**

Table S1 presents an overview of the incubations including depth, duration, and treatments applied in each set of experiments. Table S2 provides an overview of the siderophore data measured for each experiment and the estimated siderophore production from each treatment. Table S3 is an overview of Fe:C quotas of heterotrophic bacteria to date. Figure S1 is an overview of biological response for each individual experiment and depth that is summarized in main text boxplots of Figure 2. Figure S2 is an overview of size distribution and biomass response from small and large bacteria data derived from flow cytometry measurements. Figure S3 shows the particulate Fe and P data across all experiments. Figure S4 shows the total carbon demand and bacteria growth efficiency across all experiments and treatments where carbon substrates were added. Figure S5 is a comparison of multiple independent ways of calculating Fe quotas presented in main text Figure 6. Figure S6 displays the macronutrient and dissolved organic carbon measurements from each experiment.

| Experiment                                     | Cruise      | Depth<br>(duration)                          | Carbon Added                                                        | Treatments                                                                                           |
|------------------------------------------------|-------------|----------------------------------------------|---------------------------------------------------------------------|------------------------------------------------------------------------------------------------------|
| 60 $\mu$ M Organic Carbon:<br>Subtropical Gyre | Gradients 4 | 200 m (48 h)<br>250 m (72 h)<br>450 m (48 h) | 60 $\mu$ M Organic Carbon<br>(10 $\mu$ M glucose)                   | Control<br>+Fe (1nM Fe <sup>57</sup> )<br>+Glucose<br>+Fe+Glucose                                    |
| 60 $\mu$ M Organic Carbon:<br>Equator          | Gradients 4 | 100 m (72 h)<br>300 m (92 h)                 | 60 $\mu$ M Organic Carbon<br>(10 $\mu$ M glucose)                   | Control<br>+Fe (1nM Fe <sup>57</sup> )<br>+Glucose<br>+Fe+Glucose                                    |
| 10 $\mu$ M Organic Carbon:<br>Equator          | Gradients 5 | 95 m (48 h)<br>295 m (56 h)                  | 10 $\mu$ M Organic Carbon (1.67<br>$\mu$ M glucose and glucosamine) | Control<br>+Fe (1nM Fe <sup>57</sup> )<br>+Glucose<br>+Fe+Glucose<br>+Glucosamine<br>+Fe+Glucosamine |

**Table S1. Incubation overview.** Presented is a table the summarizes the number of depths, incubation time, organic carbon added, and number of treatments for each experiment spanning the Gradients 4 and 5 cruises.

| Incubation           | Depth | C Addition ( $\mu$ M) | Treatment       | [Siderophore] (pM) | Bacteria cells (cells $\mu$ L <sup>-1</sup> ) | Cell stdev. | Siderophore quota (amol cell <sup>-1</sup> ) |
|----------------------|-------|-----------------------|-----------------|--------------------|-----------------------------------------------|-------------|----------------------------------------------|
| Gradients 4: Grye    | 200   | -                     | in-situ         | 3.7                | 124                                           | na          | 0.0296                                       |
| Gradients 4: Grye    | 200   | 0                     | Control         | 8.6                | 127                                           | 3           | 0.0676                                       |
| Gradients 4: Grye    | 200   | 0                     | Fe+             | 6.5                | 130                                           | 2           | 0.0500                                       |
| Gradients 4: Grye    | 200   | 60                    | Glucose+        | 7.1                | 138                                           | 8           | 0.0511                                       |
| Gradients 4: Grye    | 200   | 60                    | Fe+Glucose+     | 4.7                | 381                                           | 157         | 0.0123                                       |
| Gradients 4: Grye    | 250   | -                     | in-situ         | 4.9                | 95                                            | na          | 0.0511                                       |
| Gradients 4: Grye    | 250   | 0                     | Control         | 11.7               | 97                                            | 4           | 0.1196                                       |
| Gradients 4: Grye    | 250   | 0                     | Fe+             | 6.3                | 98                                            | 2           | 0.0646                                       |
| Gradients 4: Grye    | 250   | 60                    | Glucose+        | 2078.4             | 3171                                          | 430         | 0.6554                                       |
| Gradients 4: Grye    | 250   | 60                    | Fe+Glucose+     | 341.9              | 4727                                          | 57          | 0.0723                                       |
| Gradients 4: Grye    | 450   | -                     | in-situ         | 8.4                | 61                                            | na          | 0.1386                                       |
| Gradients 4: Grye    | 450   | 0                     | Control         | 8.7                | 62                                            | 5           | 0.1412                                       |
| Gradients 4: Grye    | 450   | 0                     | Fe+             | 2.6                | 66                                            | 2           | 0.0393                                       |
| Gradients 4: Grye    | 450   | 60                    | Glucose+        | 2.9                | 83                                            | 16          | 0.0350                                       |
| Gradients 4: Grye    | 450   | 60                    | Fe+Glucose+     | 144.1              | 2110                                          | 1365        | 0.0683                                       |
| Gradients 4: Equator | 100   | -                     | in-situ         | 4.5                | 310                                           | na          | 0.0145                                       |
| Gradients 4: Equator | 100   | 0                     | Control         | 3.7                | 547                                           | 101         | 0.0067                                       |
| Gradients 4: Equator | 100   | 0                     | Fe+             | 2.6                | 450                                           | 32          | 0.0058                                       |
| Gradients 4: Equator | 100   | 60                    | Glucose+        | 44.2               | 1274                                          | 482         | 0.0347                                       |
| Gradients 4: Equator | 100   | 60                    | Fe+Glucose+     | 97.3               | 4375                                          | 131         | 0.0222                                       |
| Gradients 4: Equator | 300   | -                     | in-situ         | 3.9                | 152                                           | na          | 0.0257                                       |
| Gradients 4: Equator | 300   | 0                     | Control         | 40.5               | 199                                           | 6           | 0.2042                                       |
| Gradients 4: Equator | 300   | 0                     | Fe+             | 6.8                | 191                                           | 11          | 0.0356                                       |
| Gradients 4: Equator | 300   | 60                    | Glucose+        | 1166.0             | 1759                                          | 319         | 0.6630                                       |
| Gradients 4: Equator | 300   | 60                    | Fe+Glucose+     | 181.5              | 4270                                          | 41          | 0.0425                                       |
| Gradients 5: Equator | 95    | -                     | in-situ         | 21.9               | 292                                           | na          | 0.0750                                       |
| Gradients 5: Equator | 95    | 0                     | Control         | 9.9                | 418                                           | 164         | 0.0237                                       |
| Gradients 5: Equator | 95    | 0                     | Fe+             | 17.4               | 423                                           | 116         | 0.0410                                       |
| Gradients 5: Equator | 95    | 10                    | Glucose+        | 53.2               | 1105                                          | 405         | 0.0482                                       |
| Gradients 5: Equator | 95    | 10                    | Fe+Glucose+     | 6.5                | 1249                                          | 187         | 0.0052                                       |
| Gradients 5: Equator | 95    | 10                    | Glucosamine+    | 7.7                | 369                                           | 92          | 0.0208                                       |
| Gradients 5: Equator | 95    | 10                    | Fe+Glucosamine+ | 8.9                | 661                                           | 432         | 0.0134                                       |
| Gradients 5: Equator | 295   | -                     | in-situ         | 18.1               | 177                                           | na          | 0.1023                                       |
| Gradients 5: Equator | 295   | 0                     | Control         | 11.2               | 330                                           | 150         | 0.0338                                       |
| Gradients 5: Equator | 295   | 0                     | Fe+             | 12.7               | 252                                           | 34          | 0.0503                                       |
| Gradients 5: Equator | 295   | 10                    | Glucose+        | 31.7               | 1200                                          | 108         | 0.0265                                       |
| Gradients 5: Equator | 295   | 10                    | Fe+Glucose+     | 9.0                | 993                                           | 66          | 0.0091                                       |
| Gradients 5: Equator | 295   | 10                    | Glucosamine+    | 7.5                | 232                                           | 42          | 0.0323                                       |
| Gradients 5: Equator | 295   | 10                    | Fe+Glucosamine+ | 17.6               | 242                                           | 44          | 0.0729                                       |

**Table S2. Total siderophores and siderophore quotas.** This table presents the dissolved siderophore concentrations measured in each experiment. Each siderophore sample was pooled from the treatment triplicates to form a single sample for each treatment. The cell abundances represent the average from the triplicate measurements from each treatment.

| Source                             | Fe:C<br>( $\mu\text{mol}:\text{mol}$ ) | Notes                                                                                                                                                                                   |
|------------------------------------|----------------------------------------|-----------------------------------------------------------------------------------------------------------------------------------------------------------------------------------------|
| <i>Bundy and Manck et al. 2024</i> | 88 – 711                               | Radiogenic $^{55}\text{Fe}$ uptake rates from microbial communities using different Fe forms at 300 m depth station ALOHA for ~1 cell generation. Considered a short-term uptake quota. |
| <i>Tortell et al. 1996</i>         | $7.52 \pm 1.65$                        | Radiogenic $^{55}\text{Fe}$ internalization ratio of five culture isolates from the Sargasso Sea under Fe-limited conditions for >8 cell generations. Considered a biomass quota.       |
| <i>Fourquez et al. 2014</i>        | $0.43 \pm 0.1$                         | Radiogenic $^{55}\text{Fe}$ internalization ratio of oceanic strain of <i>Alteramonas macleodii</i> under Fe-deficient conditions for >8 cell generations. Considered a biomass quota.  |
| <i>Fourquez et al. 2014</i>        | $16.1 \pm 2.3$                         | Radiogenic $^{55}\text{Fe}$ internalization ratio of oceanic strain of <i>Alteramonas macleodii</i> under Fe-replete conditions for >8 cell generations. Considered a biomass quota.    |
| <i>Fourquez et al. 2014</i>        | $0.56 \pm 0.19$                        | Radiogenic $^{55}\text{Fe}$ internalization ratio of coastal strain of <i>Alteramonas macleodii</i> Fe-deficient conditions for >8 cell generations. Considered a biomass quota.        |
| <i>Fourquez et al. 2014</i>        | $141 \pm 24.7$                         | Radiogenic $^{55}\text{Fe}$ internalization ratio of coastal strain of <i>Alteramonas macleodii</i> Fe-replete conditions for >8 cell generations. Considered a biomass quota.          |
| <i>Mazzotta et al. 2021</i>        | 83–84                                  | Bulk measurement from culture of <i>Psuedoalteramonas</i> strain with an accompanying metalloproteome measurement. Considered a biomass quota.                                          |
| <i>This study</i>                  | 5.7–3215                               | Represents the minimum and maximum measurements estimate from biogenic Fe measurements and flow cytometry C biomass. Considered a biomass quota.                                        |

**Table S3. Summary table of Fe quotas of heterotrophic bacteria.** The existing Fe quotas of marine heterotrophic bacteria in the literature. We include the broad range observed from this study as a comparison.

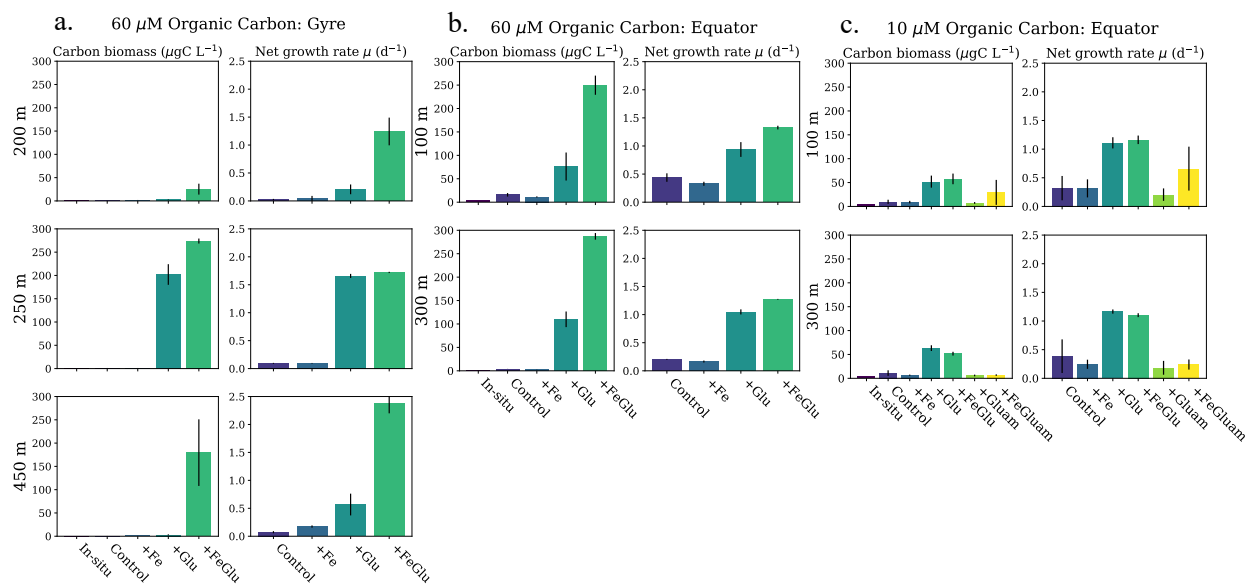

**Figure S1. Overview of the biological response in each experiment.** For each experiment incorporated in Figure 2 of the main, the biological response is presented for each treatment and depth. Depicted is the carbon biomass ( $\mu\text{gC L}^{-1}$ ) estimated via flow cytometry (see Methods) and net growth rate ( $\ln(\text{C-biomass}_{\text{final}}/\text{C-biomass}_{\text{in-situ}})/\text{time}(\text{days})$ ) for (a) 60  $\mu\text{M}$  organic carbon: gyre, (b) 60  $\mu\text{M}$  organic carbon: equator, and (c) 10  $\mu\text{M}$  organic carbon: equator. Error bars represent the standard deviation of triplicate treatment conditions.

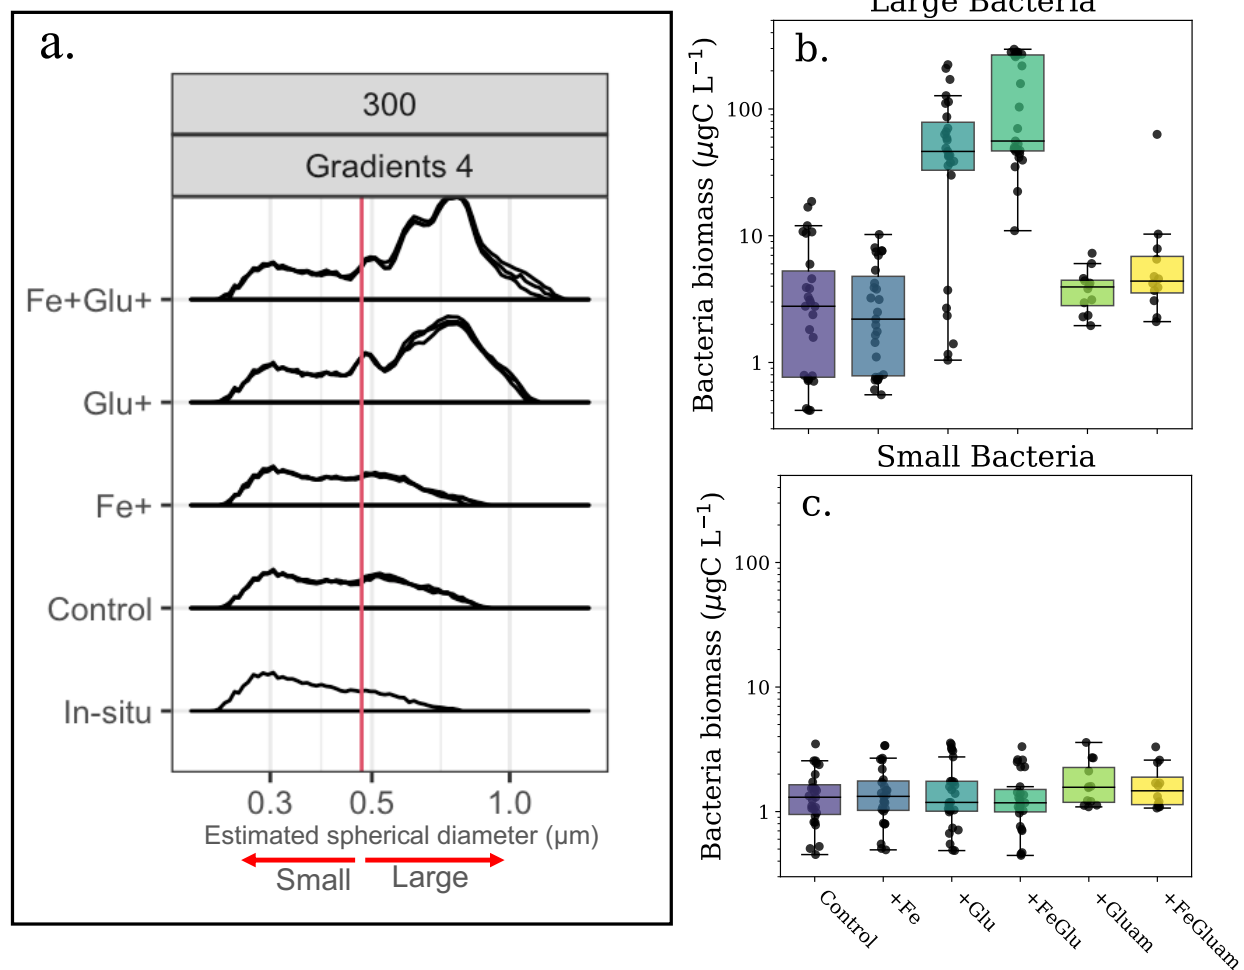

**Figure S2. Size response of bacteria to incubation conditions.** (a) Displayed is an example of the size distribution of bacteria cells from the flow cytometry samples from one incubation experiment (60  $\mu\text{M}$  organic carbon, 300 m, equator). A threshold of 0.475  $\mu\text{m}$  (red line) was used as a size cutoff between small and large bacteria distributions. The carbon biomass estimates for the large (b) and small (c) size classes are presented across all experiments.

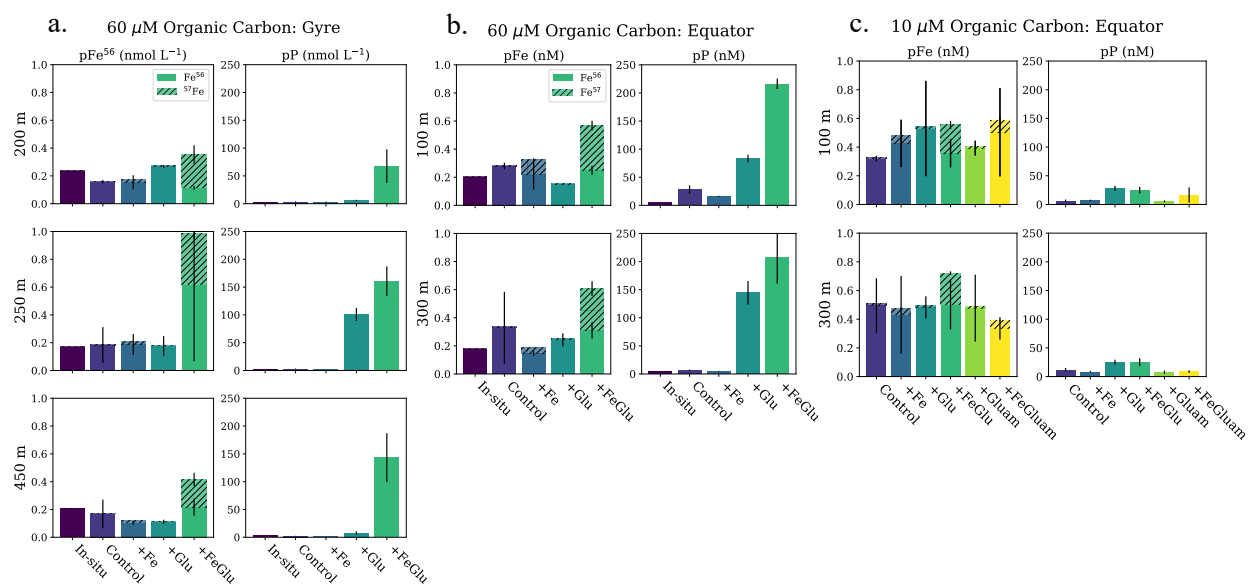

**Figure S3. Biogenic Fe and P from Gradients 4 and 5 incubations.** Presented is the particle data collected at the termination of each incubation experiment for the (a) 60  $\mu$ M organic carbon: gyre, (b) 60  $\mu$ M organic carbon: equator, and the (c) 10  $\mu$ M organic carbon: equator experiments. Total particulate Fe (pFe; left column) represents the cumulative measurements of natural Fe<sup>56</sup> and the added Fe<sup>57</sup> (hatched area) used to trace biomass accumulation. Particulate phosphorous (pP) is presented in the right column as a macromolecular tracer of biomass.

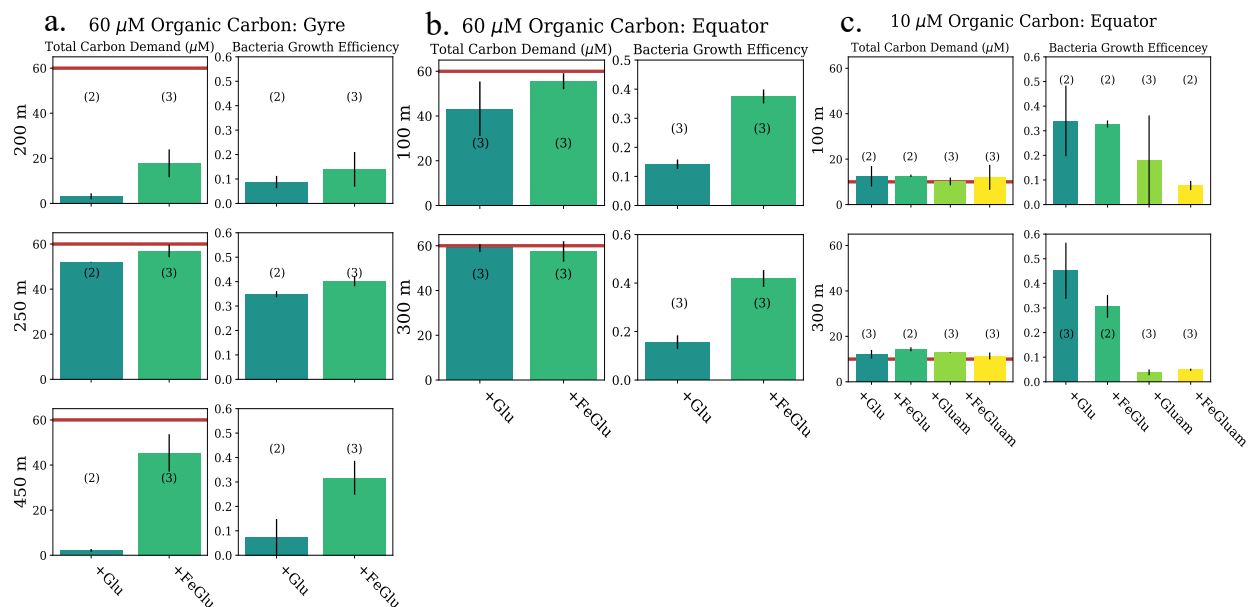

**Figure S4. Total Carbon Demand and Bacteria Growth Efficiency for the Gradients 4 and 5 incubations.** Presented is the estimated total carbon demand and bacteria growth efficiency for each carbon amended treatment for each incubation in this study from the (a) 60  $\mu$ M organic carbon" gyre , (b) 60  $\mu$ M organic carbon: equator, and (c) 10  $\mu$ M organic carbon: equator experiments. Total carbon demand is presented for each treatment with a carbon addition, the concentration of each spike (60  $\mu$ M or 10  $\mu$ M) for each incubation is represented by the red lines. The bacteria growth efficiency is the fraction of total carbon demand converted to biomass. \*If a sample had a calculated BGE higher than expected from natural marine bacteria (>0.8) it was removed from the average presented, likely indicating contamination of the final DOC sample.



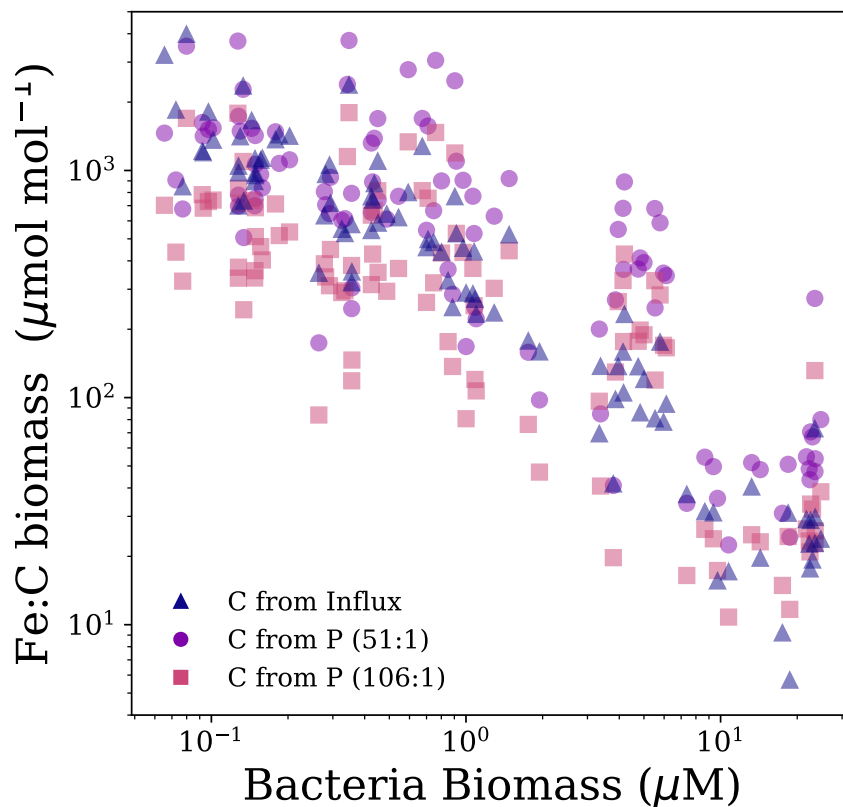

**Figure S5. Comparison of Fe quotas against bacteria biomass estimates.** To confirm the relationship displayed in Figure 4a is not an artifact in the redundant use of Carbon biomass estimates for the Fe:C quotas we estimated them independently from particulate P values for comparison. The graph depicts the Fe:C quotas calculated from flow cytometry carbon biomass estimates (blue triangles), Fe:C from particulate P assuming a C:P ratio of 51:1 (purple circles) used in Mazzotta et al. 2020, and a C:P ratio assuming Redfield ratio of 106:1 (burgundy squares). These two different estimates of bacteria biomass (particulate P and flow cytometry C biomass) show strong overlap in the observed relationship and provide additional support for the interpretation.

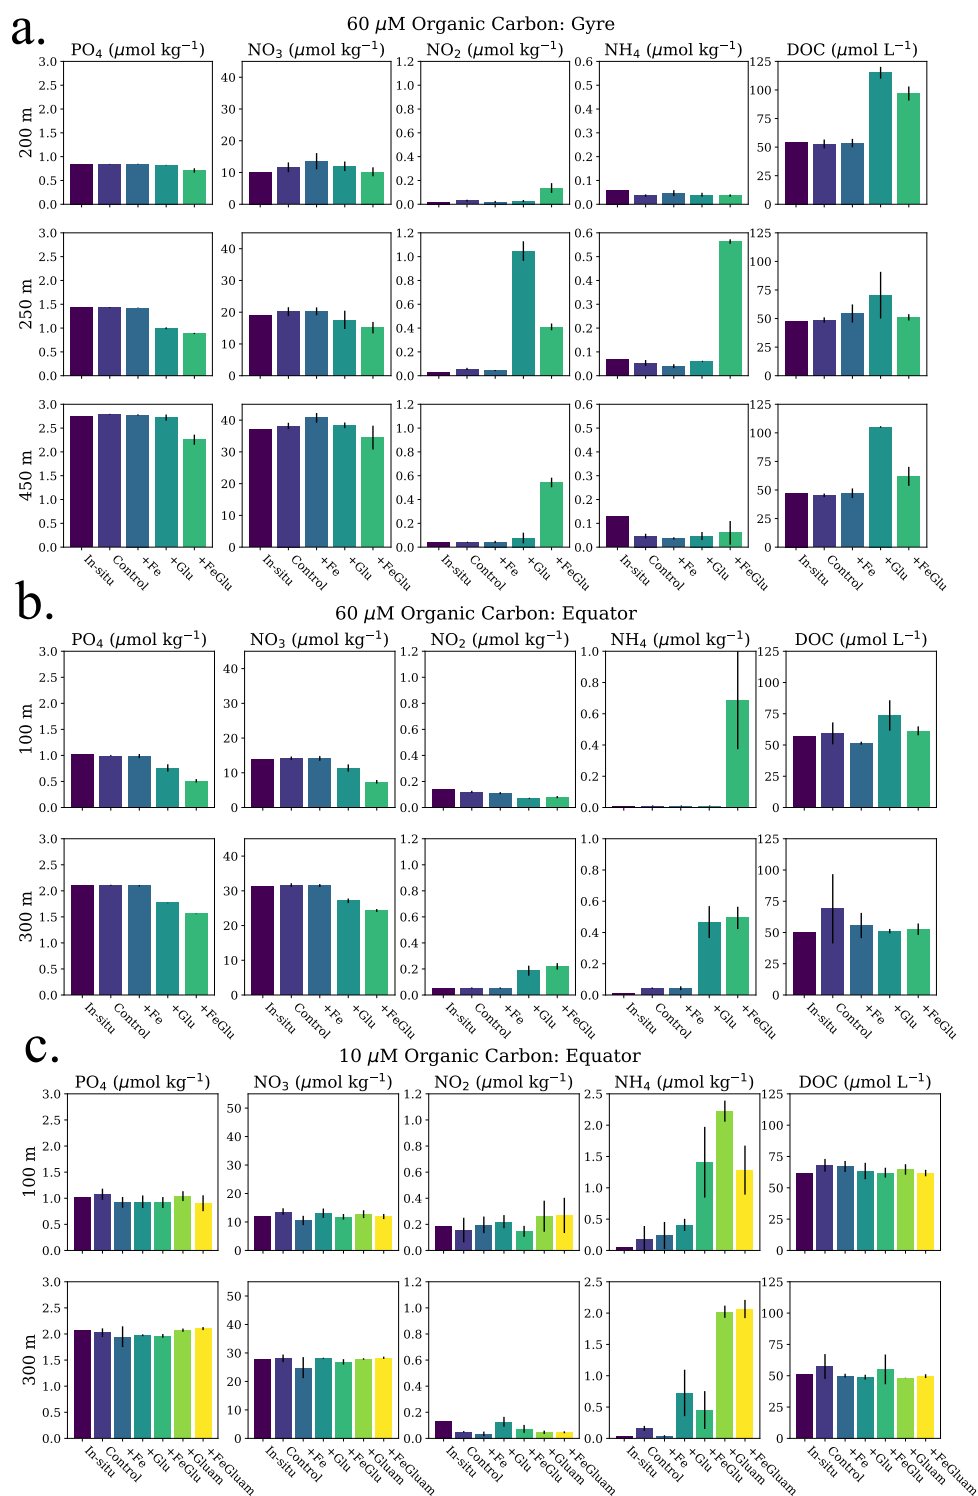

**Figure S6.** Macronutrient and Dissolved Organic Carbon (DOC) concentrations for the Gradients 4 and 5 incubations. In this series of panel plots is presented the macronutrient data for dissolved phosphate (first column), nitrate (second column), nitrite (third column), ammonia (fourth column) and DOC (fifth column) for the experiments conducted at each of the three stations and carbon loads.
